# Supplementary material for: The effect of N-vacancy on the photocatalytic activity of graphitic carbon nitride in the oxidative Mannich reaction
Source: Royal Society of Chemistry journal article supplement (doi:10.1039/d3cy00046j), 2023-01-01
Supplement: d3cy00046j1.pdf [file d3cy00046j1.pdf]

## Supporting Information

### **The effect of *N*-vacancy on the photocatalytic activity of graphitic carbon nitride in oxidative Mannich reaction**

Temirlan Kubanaliev<sup>1,3</sup>, Zafer Eroglu<sup>1</sup>, Melek Sermin Ozer<sup>1,\*</sup>, Onder Metin<sup>1,2,3,\*</sup>

<sup>1</sup>Department of Chemistry, College of Sciences, Koç University, 34450 Istanbul, Türkiye.

<sup>2</sup>Koç University Surface Science and Technology Center (KUYTAM), Istanbul 34450, Türkiye.

<sup>3</sup>Koç University Tüpraş Energy Center (KUTEM), 34450 Sarıyer, Istanbul, Türkiye.

e-mail: [melekozer@ku.edu.tr](mailto:melekozer@ku.edu.tr) (M.S. Ozer); [ometin@ku.edu.tr](mailto:ometin@ku.edu.tr) (O. Metin)

## Materials

Urea ( $\text{CH}_4\text{N}_2\text{O}$ ) (Merck) (99%), Tetrahydroisoquinoline ( $\text{C}_9\text{H}_{11}\text{N}$ ) (THIQ) (Sigma-Aldrich) (95%), Copper(I) iodide ( $\text{CuI}$ ) (98%), tripotassium phosphate ( $\text{K}_3\text{PO}_4$ ) (Sigma-Aldrich) (98%), Ethylene glycol ( $\text{C}_2\text{H}_6\text{O}_2$ ), Iodobenzene ( $\text{C}_6\text{H}_5\text{I}$ ) (Alfa Aesar) (98%), 4'-Iodoacetophenone ( $\text{C}_8\text{H}_7\text{IO}$ ) (Alfa Aesar) (98%), Potassium iodide ( $\text{KI}$ ) (Merck), Hydrogen Peroxide ( $\text{H}_2\text{O}_2$ ) (ISOLAB) (35%), were purchased from various companies. All chemicals and solvents were used as received without further purification

## Catalyst characterization

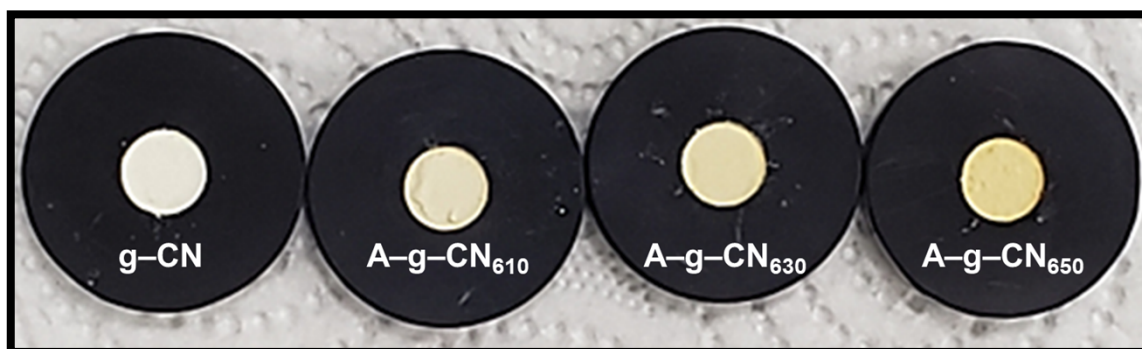

**Figure S1.** Images of g-CN, A-g-CN<sub>610</sub>, A-g-CN<sub>630</sub> and A-g-CN<sub>650</sub> in sample holders.

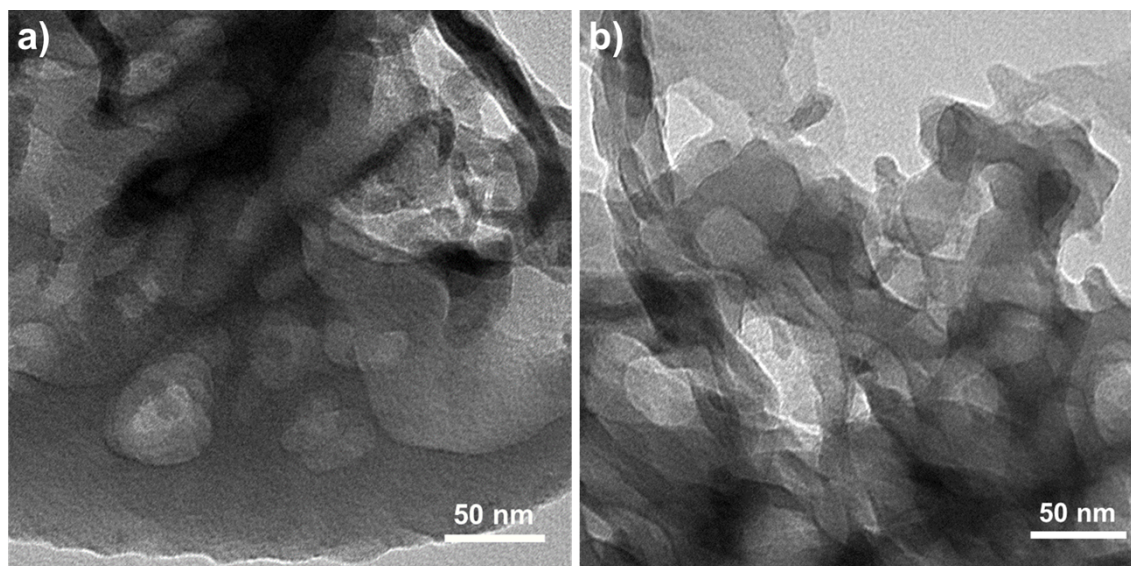

**Figure S2.** TEM images of A-g-CN<sub>610</sub> and A-g-CN<sub>630</sub>.

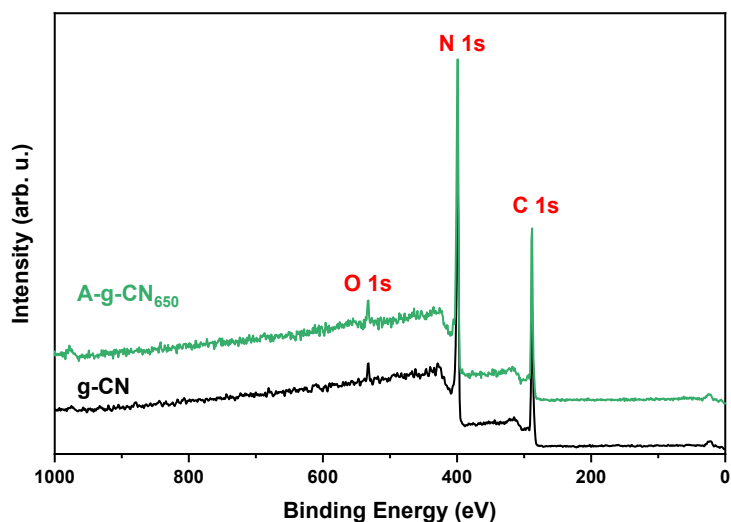

**Figure S3.** XPS survey spectra of g-CN and A-g-CN<sub>650</sub>.

### KI-starch test

KI-starch test was used to detect peroxides formed during the reaction<sup>1,2</sup>. The KI-starch stock solution was prepared by dissolving 1 g of commercial starch and 500 mg of KI in 30 mL of distilled water. A control experiment was performed by adding 0.25 mmol of H<sub>2</sub>O<sub>2</sub> (35%) to the KI-starch stock solution. The oxidative Mannich-type reaction was conducted using 0.25 mmol of *N*-phenyl tetrahydroisoquinoline (**1b**), 10 equivalents of Acetone (**2a**), 0.2 equivalents of L-proline, O<sub>2</sub> balloon and 5 mg of catalyst in 1 mL of DMSO. The reaction mixture was then irradiated with white light (150 W) for 2 h at 25 °C. An oxidative Mannich-type reaction was tested under three different conditions: i) without the KI-starch stock solution ii) with the addition of the KI-starch stock solution before light irradiation, and iii) with the addition of the KI-starch stock solution after 2 h of light irradiation.

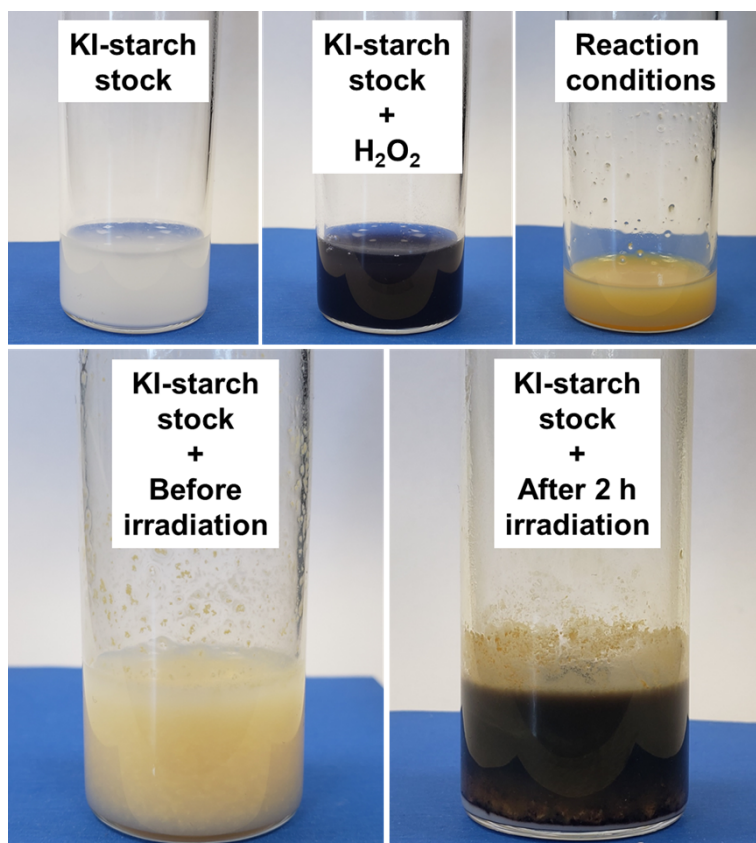

**Figure S4.** KI-starch test summary. From top-left, KI-starch stock, KI-starch control with H<sub>2</sub>O<sub>2</sub>, oxidative Mannich-type reaction conditions, oxidative Mannich-type reaction with KI-starch stock solution before light irradiation, oxidative Mannich-type reaction with KI-starch stock solution after 2 h light irradiation.

## Reusability experiments

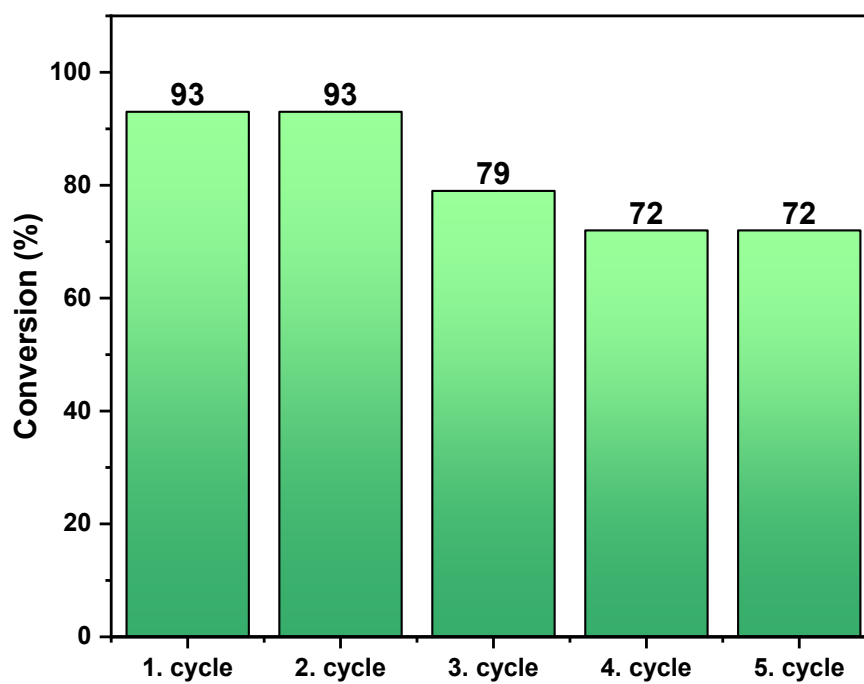

**Figure S5.** Reusability of A-g-CN<sub>650</sub> on photoredox oxidative Mannich reaction.

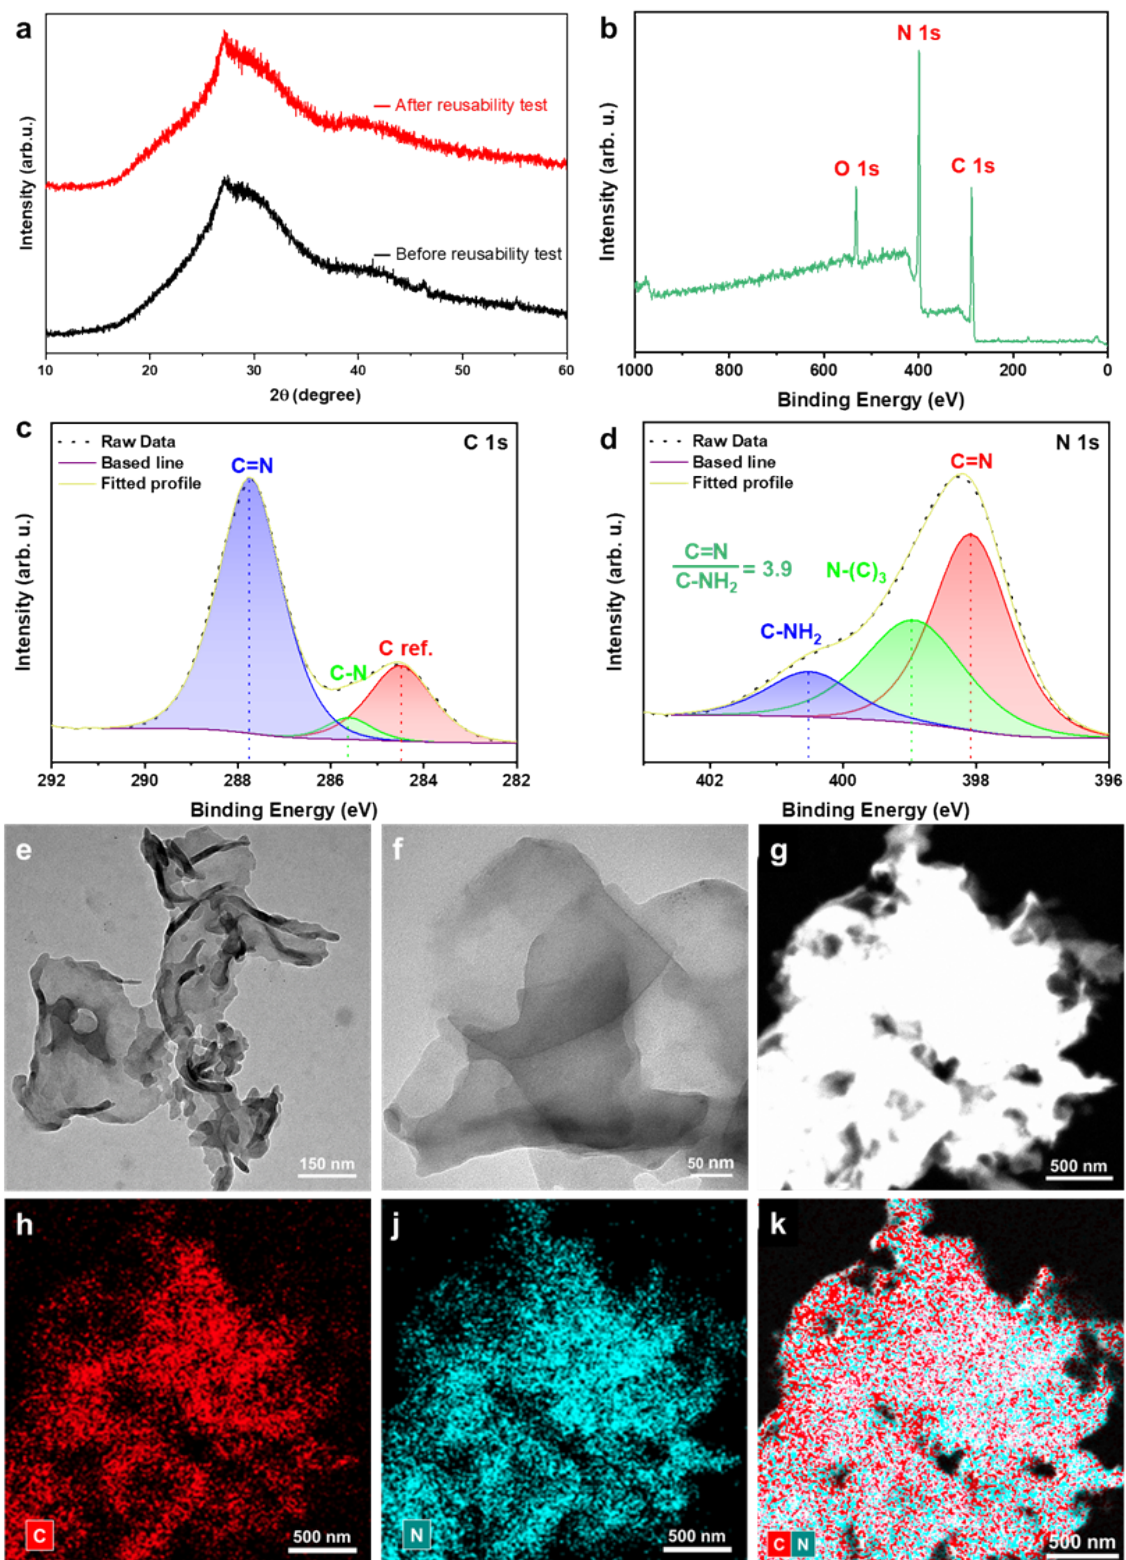

**Figure S6.** a) XRD patterns before and after reusability of A-g-CN<sub>650</sub>. b) XPS survey spectra, and high-resolution spectra of c) C1s, d) N1s regions of A-g-CN<sub>650</sub> after reusability test. e-f) TEM images of A-g-CN<sub>650</sub> after reusability test at different magnifications. g) HAADF-STEM image and h-k) elementals mappings of the A-g-CN<sub>650</sub> after reusability test.

## Conversion calculations from the $^1\text{H}$ NMR for the substrate scope of the C–C bond formation

The reaction conversions were calculated using relative areas of peak from  $^1\text{H}$  NMR of products after drying. As a reference, hydrogen atoms highlighted in red (**Figure S 5**) were calibrated to value of two and the quartet peak at  $\delta$  5.4 was attributed to the hydrogen atom in the product highlighted in the blue. The conversion was calculated by taking percent ratio of product peak to the sum of (**H**) reactant peak divided by two and (**H**) product peak. The sample calculation example is given below.

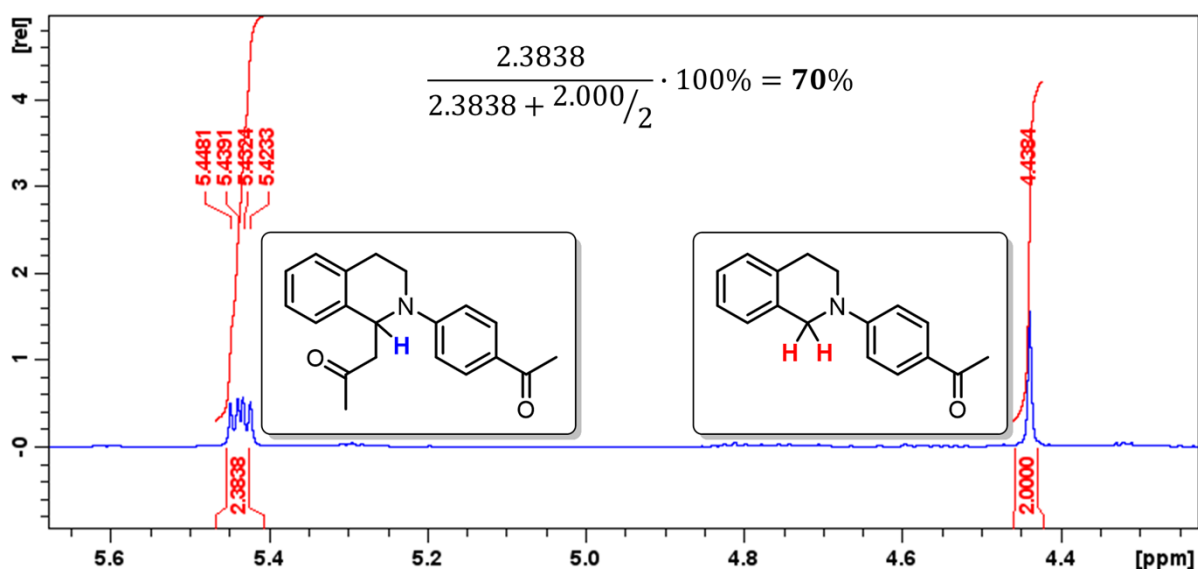

**Figure S6.** Sample conversion calculation example of oxidative Mannich type reaction.

## GC-MS spectra of the tetrahydroisoquinoline derivatives with alcohols.

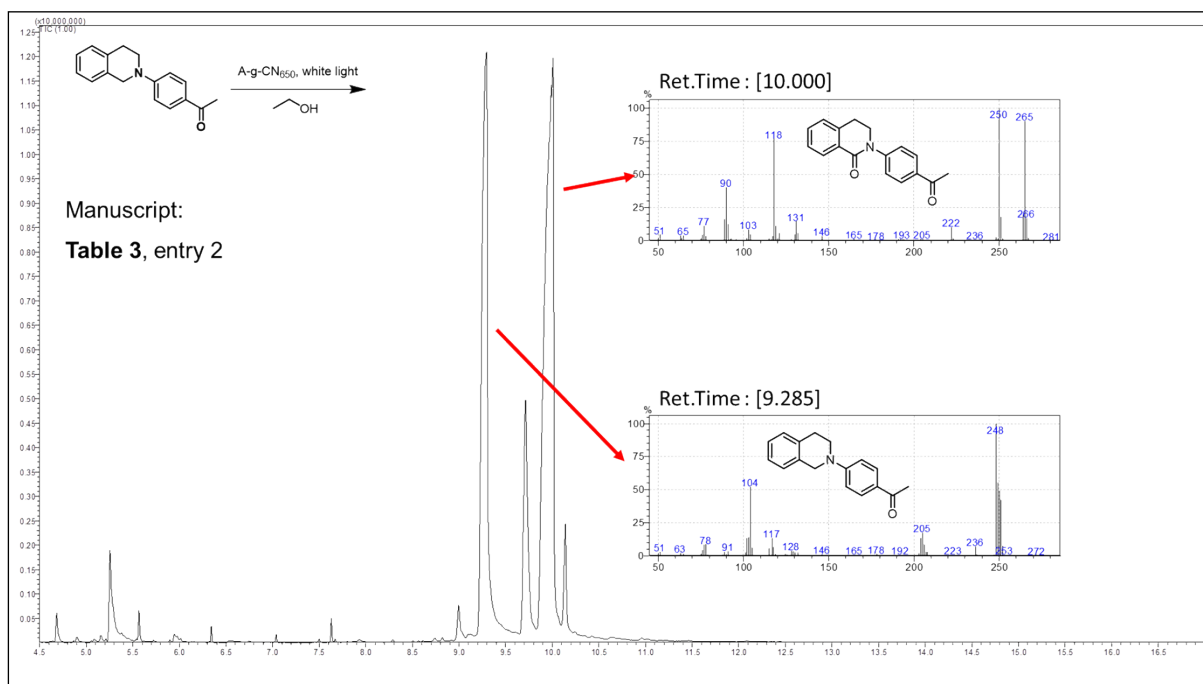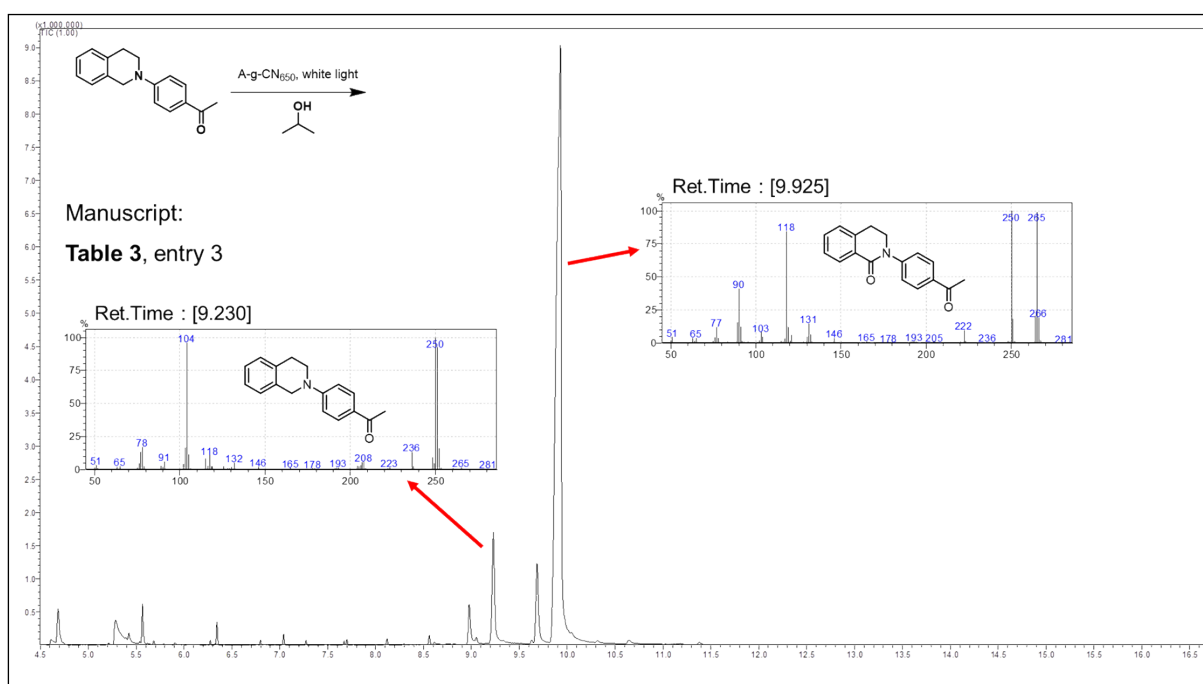



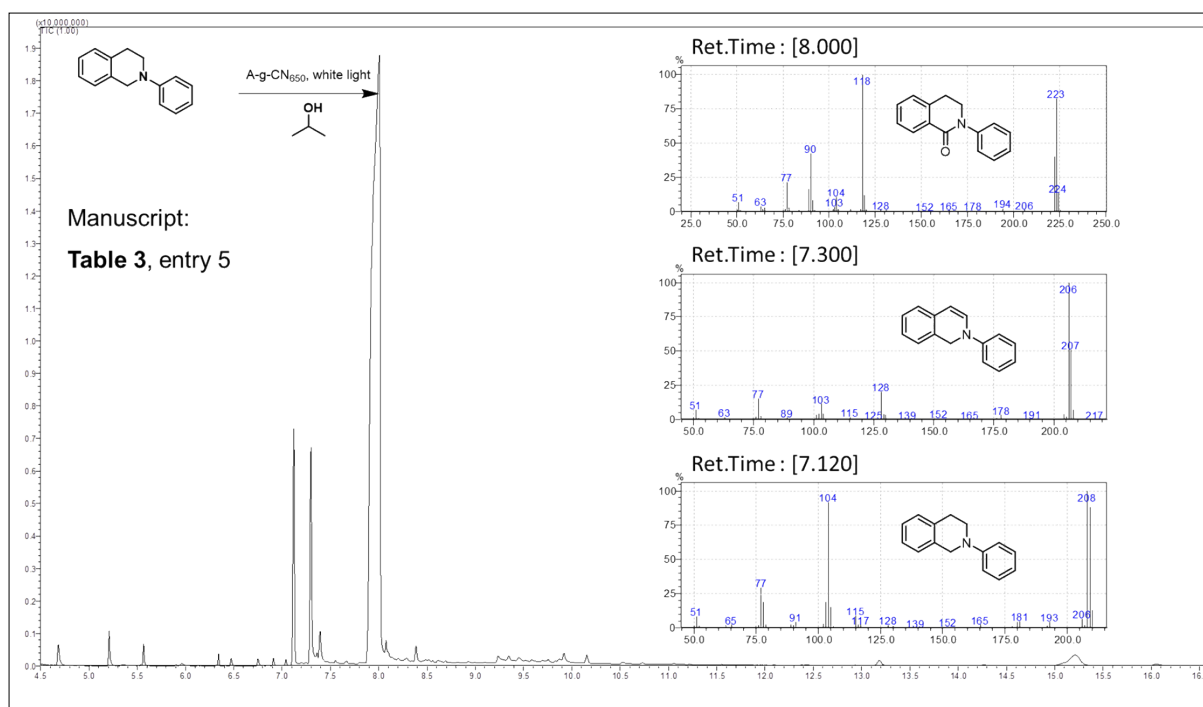

## <sup>1</sup>H NMR spectra of the tetrahydroisoquinoline derivatives.

|  |                                                                                                                                                                                                                                                                                                                                                 |
|--|-------------------------------------------------------------------------------------------------------------------------------------------------------------------------------------------------------------------------------------------------------------------------------------------------------------------------------------------------|
|  | <p><i>N</i>-(4-acetylphenyl)tetrahydroisoquinoline (<b>1a</b>)<sup>3</sup></p> <p>isolation by column chromatography (hexane/EtOAc: 90/5)</p> <p><sup>1</sup>H NMR (500 MHz, CDCl<sub>3</sub>): δ 8.22 – 8.20 (d, <i>J</i> = 8.4 Hz, 2H), 7.52 – 7.50 (m, 2H), 7.41 – 7.40 (m, 1H), 6.33 – 6.31 (m, 1H), 6.28 – 6.26 (m, 1H), 1.43 (s, 9H).</p> |
|  | <p><i>N</i>-phenyl tetrahydroisoquinoline (<b>1b</b>)<sup>3</sup></p> <p>isolation by column chromatography (hexane/EtOAc: 90/5)</p> <p><sup>1</sup>H NMR (500 MHz, CDCl<sub>3</sub>): δ 7.19 (m, 2H), 7.09 – 7.07 (m, 4H), 6.90 – 6.89 (m, 2H), 6.76 – 6.73 (m, 1H), 4.32 (s, 2H), 3.49 – 3.46 (m, 2H), 2.91 – 2.89 (m, 2H).</p>               |
|  | <p><i>N</i>-<i>tert</i>-butoxycarbonyl tetrahydroisoquinoline (<b>1c</b>)<sup>4</sup></p> <p>isolation by column chromatography (hexane/EtOAc: 90/5)</p> <p><sup>1</sup>H NMR (500 MHz, CDCl<sub>3</sub>): δ 7.36 – 7.27 (m, 5H), 6.24 – 6.22 (m, 1H), 6.19 (dd, <i>J</i> = 3.2, 1.8 Hz, 1H), 1.34 (s, 9H).</p>                                 |

# <sup>1</sup>H NMR spectral data of the tetrahydroisoquinoline derivatives.

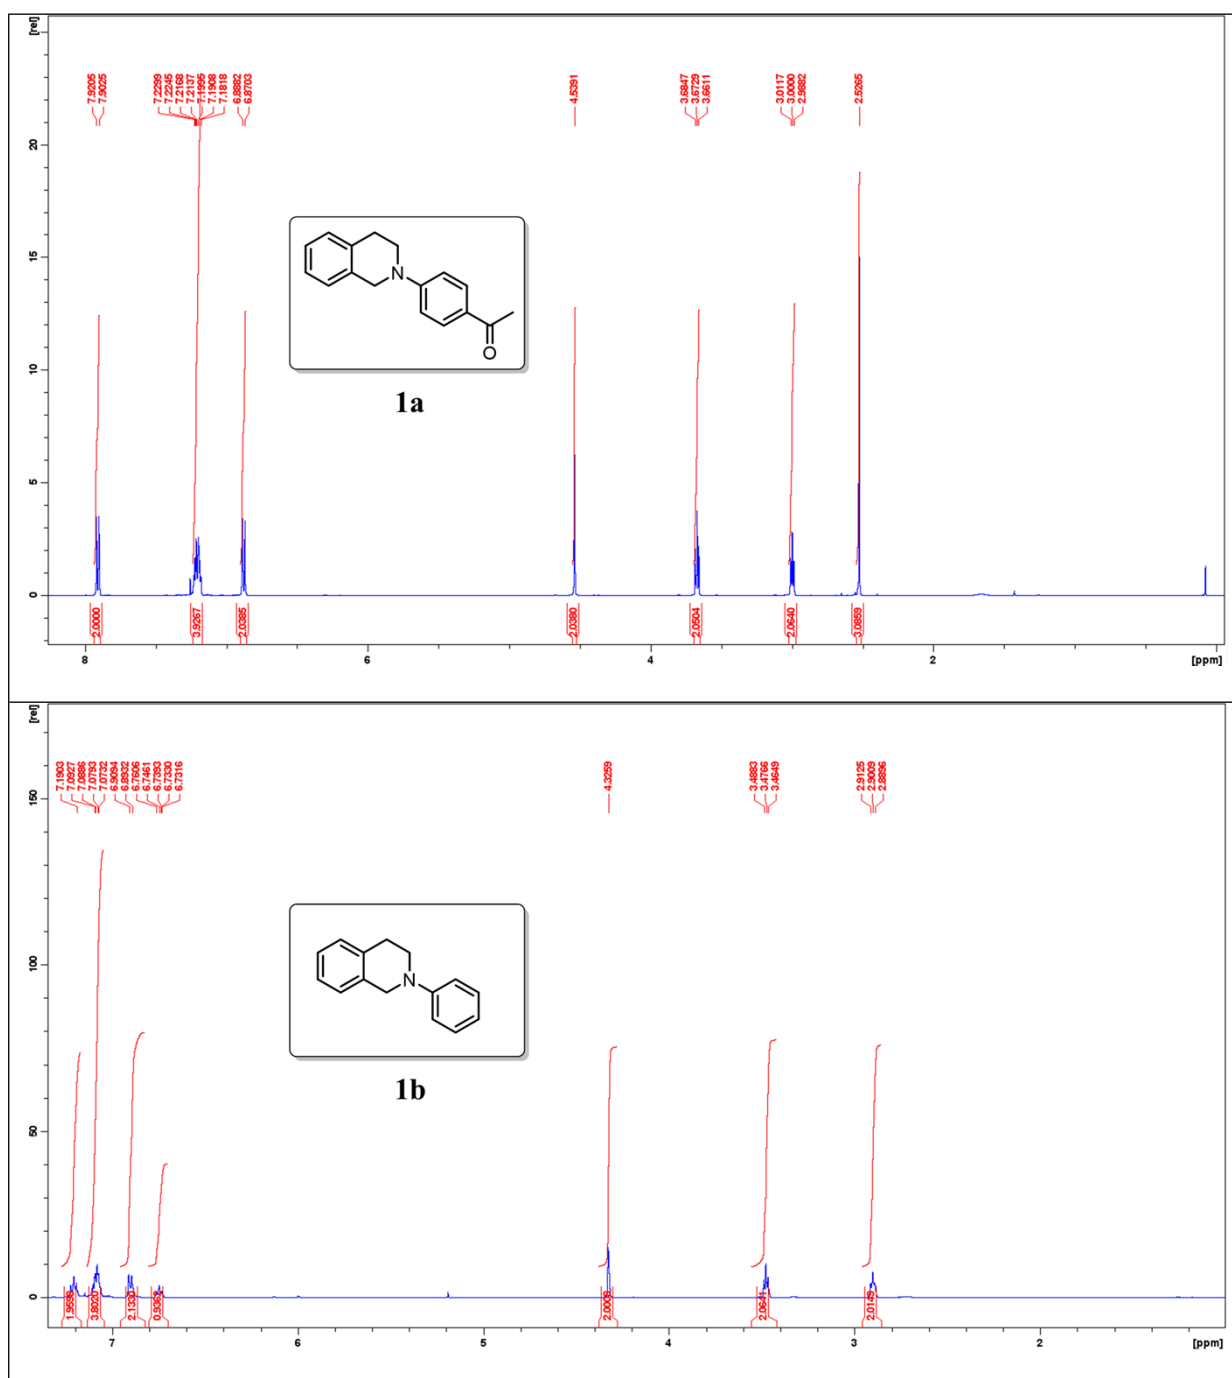

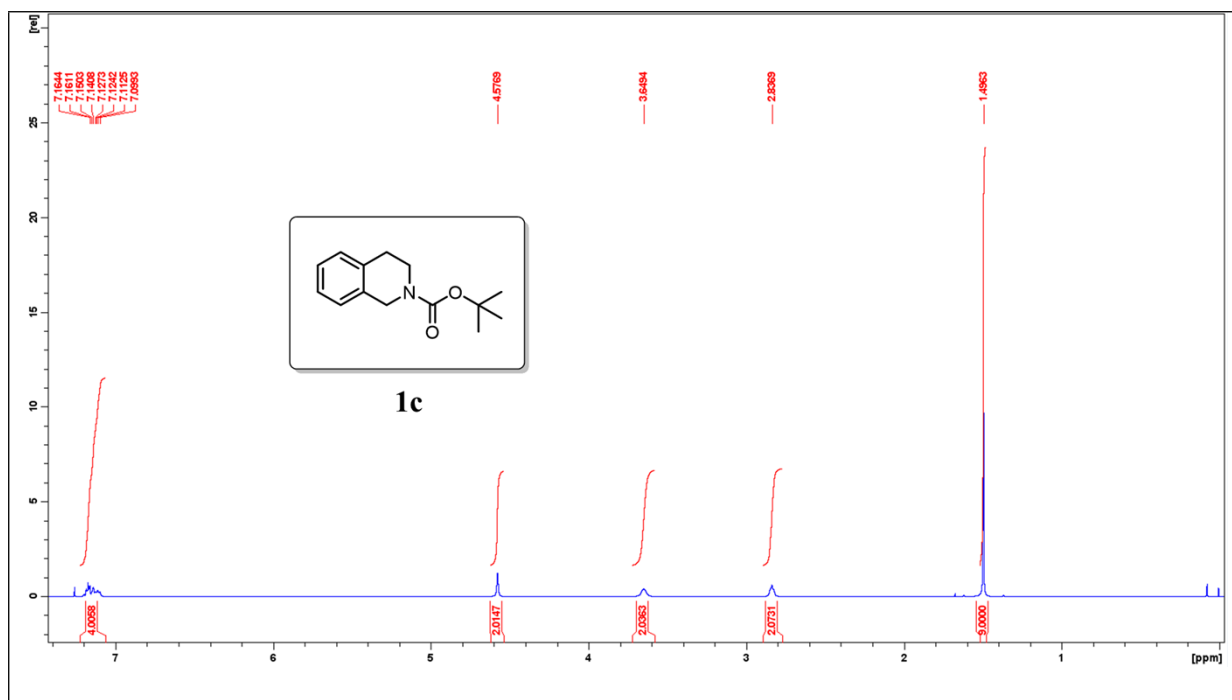

## References

- 1 Y. Nosaka and A. Y. Nosaka, *Chem Rev*, 2017, **117**, 11302–11336.
- 2 E. Tatumashvili, B. Chan, P. E. Nashar and C. S. P. McErlean, *Org Biomol Chem*, 2020, **18**, 1812–1819.
- 3 E. E. Bjerg, J. Marchán-García, E. Buxaderas, Y. Moglie and G. Radivoy, *Journal of Organic Chemistry*, 2022, **87**, 13480–13493.
- 4 B. Gröll, P. Schaaf and M. Schnürch, *Monatsh Chem*, 2017, **148**, 91–104.
